# Supplementary material for: Single-cell profiles reveal tumor cell heterogeneity and immunosuppressive microenvironment in Waldenström macroglobulinemia
Source: Springer Nature journal article supplement (doi:10.1186/s12967-022-03798-6), 2022-12-09
Supplement: MOESM1 [file 23809020]

## Additional file 1

**Table S1 | The baseline characteristics of WM patients**

| Sample | Age | Gender | Stage of disease | MI type       | IgM (g/L) | WBC ( $\times 10^9/L$ ) | HB (g/L) | PLT ( $\times 10^9/L$ ) | $\beta 2$ -MG (mg/L) | LDH (U/L) | MYD88 mutation | Tumor infiltration of used aspirate (%) |
|--------|-----|--------|------------------|---------------|-----------|-------------------------|----------|-------------------------|----------------------|-----------|----------------|-----------------------------------------|
| S1     | 43  | M      | ND               | IgM $\kappa$  | 3.55      | 1.88                    | 84       | 51                      | 5.32                 | 245       | Positive       | 10.78                                   |
| S2     | 55  | M      | ND               | IgM $\kappa$  | 6.86      | 4.68                    | 114      | 134                     | 3.81                 | 368.7     | Positive       | 68.37                                   |
| S3     | 48  | M      | ND               | IgM $\kappa$  | 18.3      | 4.9                     | 99       | 184                     | 21.6                 | 115.2     | Positive       | 9.17                                    |
| S4     | 47  | M      | ND               | IgM $\lambda$ | 7.73      | 5.24                    | 132      | 190                     | 2.62                 | 223.7     | Positive       | 62.33                                   |
| S5     | 58  | M      | ND               | IgM $\kappa$  | 35.8      | 4.49                    | 83       | 158                     | 4.75                 | 343       | Positive       | 17.29                                   |
| WM1    | 67  | M      | ND               | IgM $\kappa$  | 54.2      | 3.23                    | 70       | 86                      | 6.83                 | 101.1     | Positive       | 53.0                                    |
| WM2    | 55  | M      | ND               | IgM $\kappa$  | 3.91      | 9.92                    | 92       | 151                     | 4.00                 | 164.9     | Negative       | 37.15                                   |
| WM3    | 70  | M      | ND               | IgM $\kappa$  | 13.0      | 8.17                    | 107      | 192                     | 4.13                 | 486.8     | Positive       | 41.7                                    |
| WM4    | 76  | M      | ND               | IgM $\lambda$ | 5.85      | 8.87                    | 101      | 181                     | 4.51                 | 363.2     | Positive       | 58.37                                   |
| WM5    | 67  | M      | ND               | IgM $\kappa$  | 11.1      | 3.82                    | 107      | 120                     | 11.4                 | 108.3     | Negative       | 9.17                                    |
| WM6    | 74  | M      | ND               | IgM $\kappa$  | 43.9      | 12.4                    | 100      | 77                      | 4.78                 | 172.5     | Positive       | 52.0                                    |
| WM7    | 67  | F      | ND               | IgM $\kappa$  | 59.7      | 6.96                    | 86       | 159                     | 13.0                 | 188.6     | Positive       | 34.97                                   |
| WM8    | 62  | M      | ND               | IgM $\kappa$  | 66.9      | 11.13                   | 76       | 125                     | 6.31                 | 124.1     | Positive       | 47.85                                   |
| WM9    | 58  | F      | ND               | IgM $\lambda$ | 38.6      | 10.4                    | 106      | 284                     | 3.39                 | 148       | Positive       | 31.26                                   |
| WM10   | 80  | M      | ND               | IgM $\kappa$  | 22.8      | 10.41                   | 89       | 83                      | 3.76                 | 200.9     | Positive       | 38.0                                    |

Abbreviations: M, male; ND, Newly diagnosed; MI, monoclonal immunoglobulin; Ig, immunoglobulin; WBC, white blood cell; HB, hemoglobin; PLT, platelet;  $\beta 2$ -MG, beta 2-Microglobulin; LDH, lactate dehydrogenase.

**Table S2 | Signature related gene sets used in this analysis**

| Cell cycle | Immunosuppressive molecule | Antigen presentation | NK Cytotoxic | NK Activation | NK Inhibitory | TCA cycle | Glycolysis |
|------------|----------------------------|----------------------|--------------|---------------|---------------|-----------|------------|
| MAD2L2     | TNFRSF14                   | ERAP1                | FCGR3A       | CD160         | SIGLEC9       | SDHB      | ENO1       |
| ZBTB17     | CD48                       | ERAP2                | GNLY         | SLAMF6        | PDCD1         | PKLR      | PKLR       |
| E2F2       | CD47                       | CANX                 | GZMK         | CD84          | TIGIT         | SDHC      | PFKFB2     |
| SFN        | CD80                       | HLA-A                | GZMA         | SLAMF7        | HAVCR2        | FH        | HK2        |
| HDAC1      | CD86                       | HLA-C                | TNF          | LY9           | KLRG1         | MDH1      | PFKFB4     |
| CDC20      | HLA-DRA                    | HLA-B                | PRF1         | CD244         | KLRB1         | SUCLG1    | PPP2CA     |
| CDKN2C     | HLA-DRB1                   | TAP2                 | KLRD1        | FCGR3A        | KLRC1         | IDH1      | PPP2R5D    |
| ORC1       | CD274                      | PSMB8                | IFNG         | NCR3          | CEACAM1       | PDHB      | PGK1       |
| GADD45A    | LGALS9                     | PSMB9                | GZMH         | KLRF1         | SIGLEC7       | SUCLG2    | PPP2CB     |
| CDC7       | PVR                        | TAP1                 | GZMB         | KLRK1         | CD33          | SDHA      | PPP2R1B    |
| CDC14A     | NECTIN2                    | TAPBP                | TYROBP       | KLRC3         | LAIR1         | OGDH      | PFKP       |
| YWHAQ      | BTN2A2                     | PSMB7                | NKG7         | KLRC1         | LILRB1        | MDH2      | PFKFB3     |
| BUB1       | PDCD1LG2                   | PSMB5                |              | CD226         | KIR2DL3       | DLD       | HK1        |
| ANAPC1     |                            | PDIA3                |              | HCST          | KIR2DL1       | PDHA1     | PGAM1      |

|         |  |        |  |        |         |        |         |
|---------|--|--------|--|--------|---------|--------|---------|
| MCM6    |  | B2M    |  | TYROBP | KIR3DL2 | PGK1   | GAPDH   |
| ORC4    |  | PSMB10 |  | NCR1   | KIR3DL1 | IDH3G  | TP11    |
| ORC2    |  | PSMB6  |  |        |         | ACO1   | ENO2    |
| CDC25A  |  | CALR   |  |        |         | PC     | PFKM    |
| GSK3B   |  |        |  |        |         | DLAT   | PKM     |
| MCM2    |  |        |  |        |         | SDHD   | ALDOA   |
| ANAPC13 |  |        |  |        |         | PFKP   | ENO3    |
| STAG1   |  |        |  |        |         | HK1    | ALDOC   |
| TFDP2   |  |        |  |        |         | ENO2   | GPI     |
| ATR     |  |        |  |        |         | PFKM   | PPP2R1A |
| ANAPC4  |  |        |  |        |         | CS     | PFKL    |
| MAD2L1  |  |        |  |        |         | SUCLA2 | HK3     |
| CCNA2   |  |        |  |        |         | PCK2   | PGAM2   |
| ANAPC10 |  |        |  |        |         | DLST   | GAPDHS  |
| SKP2    |  |        |  |        |         | PKM    | PFKFB1  |
| CCNB1   |  |        |  |        |         | IDH3A  |         |
| CDK7    |  |        |  |        |         | IDH2   |         |
| CCNH    |  |        |  |        |         | ALDOA  |         |
| SKP1    |  |        |  |        |         | ALDOC  |         |
| CDC23   |  |        |  |        |         | ACLY   |         |
| CDC25C  |  |        |  |        |         | IDH3B  |         |
| PTTG1   |  |        |  |        |         | ACO2   |         |
| E2F3    |  |        |  |        |         | PFKL   |         |
| CDKN1A  |  |        |  |        |         | HK3    |         |
| CCND3   |  |        |  |        |         | PGAM2  |         |
| MCM3    |  |        |  |        |         | PCK1   |         |
| TTK     |  |        |  |        |         | GAPDHS |         |
| ORC3    |  |        |  |        |         |        |         |
| HDAC2   |  |        |  |        |         |        |         |
| MAD1L1  |  |        |  |        |         |        |         |
| YWHAG   |  |        |  |        |         |        |         |
| DBF4    |  |        |  |        |         |        |         |
| CDK6    |  |        |  |        |         |        |         |
| MCM7    |  |        |  |        |         |        |         |
| ORC5    |  |        |  |        |         |        |         |
| CUL1    |  |        |  |        |         |        |         |
| SMC1A   |  |        |  |        |         |        |         |
| STAG2   |  |        |  |        |         |        |         |
| PRKDC   |  |        |  |        |         |        |         |
| MCM4    |  |        |  |        |         |        |         |
| E2F5    |  |        |  |        |         |        |         |
| CCNE2   |  |        |  |        |         |        |         |
| YWHAZ   |  |        |  |        |         |        |         |

|         |  |  |  |  |  |  |  |
|---------|--|--|--|--|--|--|--|
| RAD21   |  |  |  |  |  |  |  |
| MYC     |  |  |  |  |  |  |  |
| CDKN2A  |  |  |  |  |  |  |  |
| CDKN2B  |  |  |  |  |  |  |  |
| GADD45G |  |  |  |  |  |  |  |
| CDC14B  |  |  |  |  |  |  |  |
| CDC26   |  |  |  |  |  |  |  |
| ABL1    |  |  |  |  |  |  |  |
| ANAPC2  |  |  |  |  |  |  |  |
| CDKN1C  |  |  |  |  |  |  |  |
| WEE1    |  |  |  |  |  |  |  |
| CCND1   |  |  |  |  |  |  |  |
| ATM     |  |  |  |  |  |  |  |
| CHEK1   |  |  |  |  |  |  |  |
| CDK1    |  |  |  |  |  |  |  |
| SMC3    |  |  |  |  |  |  |  |
| BUB3    |  |  |  |  |  |  |  |
| CCND2   |  |  |  |  |  |  |  |
| CDKN1B  |  |  |  |  |  |  |  |
| ESPL1   |  |  |  |  |  |  |  |
| CDK2    |  |  |  |  |  |  |  |
| CDK4    |  |  |  |  |  |  |  |
| MDM2    |  |  |  |  |  |  |  |
| ANAPC7  |  |  |  |  |  |  |  |
| ANAPC5  |  |  |  |  |  |  |  |
| RB1     |  |  |  |  |  |  |  |
| TFDP1   |  |  |  |  |  |  |  |
| CDC16   |  |  |  |  |  |  |  |
| TGFB3   |  |  |  |  |  |  |  |
| BUB1B   |  |  |  |  |  |  |  |
| CCNB2   |  |  |  |  |  |  |  |
| SMAD3   |  |  |  |  |  |  |  |
| PKMYT1  |  |  |  |  |  |  |  |
| CREBBP  |  |  |  |  |  |  |  |
| PLK1    |  |  |  |  |  |  |  |
| ORC6    |  |  |  |  |  |  |  |
| RBL2    |  |  |  |  |  |  |  |
| E2F4    |  |  |  |  |  |  |  |
| YWHAE   |  |  |  |  |  |  |  |
| TP53    |  |  |  |  |  |  |  |
| CDC6    |  |  |  |  |  |  |  |
| CDC27   |  |  |  |  |  |  |  |
| ANAPC11 |  |  |  |  |  |  |  |

|         |  |  |  |  |  |  |  |
|---------|--|--|--|--|--|--|--|
| SMAD2   |  |  |  |  |  |  |  |
| SMAD4   |  |  |  |  |  |  |  |
| CDC25B  |  |  |  |  |  |  |  |
| PCNA    |  |  |  |  |  |  |  |
| E2F1    |  |  |  |  |  |  |  |
| RBL1    |  |  |  |  |  |  |  |
| YWHAB   |  |  |  |  |  |  |  |
| GADD45B |  |  |  |  |  |  |  |
| FZR1    |  |  |  |  |  |  |  |
| CDKN2D  |  |  |  |  |  |  |  |
| CCNE1   |  |  |  |  |  |  |  |
| TGFB1   |  |  |  |  |  |  |  |
| CDC45   |  |  |  |  |  |  |  |
| CHEK2   |  |  |  |  |  |  |  |
| YWHAH   |  |  |  |  |  |  |  |
| MCM5    |  |  |  |  |  |  |  |
| RBX1    |  |  |  |  |  |  |  |
| EP300   |  |  |  |  |  |  |  |
| TGFB2   |  |  |  |  |  |  |  |
| PTTG2   |  |  |  |  |  |  |  |
| CCNB3   |  |  |  |  |  |  |  |
| SMC1B   |  |  |  |  |  |  |  |
| CCNA1   |  |  |  |  |  |  |  |

**Table S3 | Flow cytometric antibodies used in this study**

| <b>Antibodies</b>     | <b>Source</b>  | <b>Clone</b> | <b>Identifier</b> |
|-----------------------|----------------|--------------|-------------------|
| Anti-human-CD45-V500  | BD Biosciences | HI30         | Cat. No. 560777   |
| Anti-human-CD19-V450  | BD Biosciences | HIB19        | Cat. No. 560354   |
| Anti-human-CD3-PE-Cy7 | BioLegend      | OKT3         | Cat. No. 317334   |
| Anti-human-CD138-FITC | BD Biosciences | MI15         | Cat. No. 552723   |
